# Supplementary material for: Feasibility of Training Community Health Workers in the Detection of Oral Cancer
Source: PubMed Central journal article supplement (PMC8767429; doi:10.1001/jamanetworkopen.2021.44022), 2022-01-18
Supplement: jamanetwopen-e2144022-s001.pdf [file jamanetwopen-e2144022-s001.pdf]

## Supplementary Online Content

Thampi V, Hariprasad R, John A, et al. Feasibility of training community health workers in the detection of oral cancer. *JAMA Netw Open*. 2022;5(1):e2144022. doi:10.1001/jamanetworkopen.2021.44022

**eAppendix 1.** Mobile-Based Questionnaire by CHW

**eAppendix 2.** Details Collected by the Dentists at ICMR-NICPR-HPC

**eTable 1.** Identification of the Oral Lesion by CHWs and Dentists in the Screened Population

**eTable 2.** Distribution and Agreement by Type of Individual Findings on Oral Visual Inspection by CHWs and Dentists

This supplementary material has been provided by the authors to give readers additional information about their work.

**eAppendix 1: Mobile-based questionnaire by CHW**

- 1.Name of the participant
- 2.Age of the participant
- 3.Select participant's gender
- 4.Address of the participant
- 5.Contact no
- 6.Alternative contact no
- 7.Tobacco chewer
  - a. Yes b. No
- 8.Smoker
  - a. Yes b. No
- 9.Alcohol
  - a. Yes b. No
- 10.Areca nut
  - a. Yes b. No
- 11.Does the participant had any symptoms of mouth ulcer, bleeding from the teeth or gums, difficulty in swallowing, pain or burning sensation, decreased mouth opening or others: Yes, or No
- 12.On Oral visual examination by the CHW did the participant had any white patch, red patch, growth mass, ulcer, others: Yes, or No

**eAppendix 2: Details collected by the dentists at ICMR-NICPR-HPC**

- 1.Date of registration
- 2.Patient's name
- 3.Age/Sex
- 4.ID no
- 5.Mobile no
- 6.Smoking: cigarette/bidi/hookah-times per day, years, quit since
- 7.Chewing raw tobacco: times per day, years, quit since
- 8.Gutkha: times per day, years, quit since
- 9.Pan masala: times per day, years, quit since
- 10.Areca nut: times per day, years, quit since
- 11.Alcohol intake: times per day, years, quit since
- 12.Site of the lesion:
- 13.Provisional diagnosis:
- 14.Type of investigation:
- 15.Site of investigation:
- 16.Date of investigation:
- 17.Result of investigation:
- 18.Type of treatment given:
- 19.Recall:

**eTable 1. Identification of the oral lesion by CHWs and dentists in the screened population**

| TOTAL        |          | Dentists' findings |          |       |
|--------------|----------|--------------------|----------|-------|
|              |          | Positive           | Negative | Total |
| CHW findings | Positive | 321                | 9        | 330   |
|              | Negative | 11                 | 677      | 688   |
|              | Total    | 332                | 686      | 1018  |

| Statistic                     | Value (95% CI)            |
|-------------------------------|---------------------------|
| Sensitivity                   | 96.69% (94.15 to 98.33%)  |
| Specificity                   | 98.69% (97.52 to 99.40%)  |
| Positive Likelihood Ratio     | 73.70 (38.50 to 141.08)   |
| Negative Likelihood Ratio     | 0.03 (0.02 to 0.06)       |
| Disease prevalence (*)        | 32.41%                    |
| Positive Predictive Value (*) | 97.20% (94.77 to 98.52%)  |
| Negative Predictive Value (*) | 98.44% (97.25 to 99.12%)  |
| Accuracy (*)                  | 98.29% ( 97.29 to 98.99%) |

(\*) These values are dependent on disease prevalence

**eTable 2. Distribution and agreement by type of individual findings on oral visual inspection by CHWs and dentists**

| CHW findings       |          | Dentists findings |          |       | Kappa      |
|--------------------|----------|-------------------|----------|-------|------------|
|                    |          | Positive          | Negative | Total |            |
| <b>White patch</b> | Positive | 150               | 6        | 156   | <b>0.9</b> |
|                    | Negative | 7                 | 855      | 862   |            |
|                    | Total    | 157               | 912      | 1018  |            |
| <b>Red patch</b>   | Positive | 1                 | 2        | 3     | <b>1.0</b> |
|                    | Negative | 0                 | 1015     | 1015  |            |
|                    | Total    | 1                 | 1017     | 1018  |            |
| <b>Growth mass</b> | Positive | 27                | 2        | 29    | <b>1.0</b> |
|                    | Negative | 0                 | 989      | 989   |            |
|                    | Total    | 27                | 991      | 1018  |            |
| <b>Ulcer</b>       | Positive | 46                | 2        | 48    | <b>0.9</b> |
|                    | Negative | 2                 | 968      | 970   |            |
|                    | Total    | 48                | 970      | 1018  |            |
| <b>Others</b>      | Positive | 180               | 1        | 181   | <b>0.9</b> |
|                    | Negative | 2                 | 825      | 827   |            |
|                    | Total    | 182               | 826      | 1018  |            |
